# Supplementary material for: Mitral Valve Anatomic Predictors of Hemodynamic Success With Transcatheter Mitral Valve Repair
Source: PubMed Central journal article supplement — J Am Heart Assoc. 2018 Jan 13;7(2):e007315. doi: 10.1161/JAHA.117.007315 (PMC5850157; doi:10.1161/jaha.117.007315), 2018-01-13
Supplement: JAH3-7-e007315-s005.pdf [file JAH3-7-e007315-s005.pdf]

# **SUPPLEMENTAL MATERIAL**

## **Video Legends:**

**Video S1. 2D echocardiography with color Doppler imaging of a flail P2 mitral leaflet.** A mid-esophageal long axis view of the mitral valve demonstrates a flail P2 scallop (left panel) with severe mitral regurgitation (right panel). A single, discrete jet of mitral regurgitation is present. Best viewed in wmv format.

**Video S2. 3D echocardiographic left atrial view of a flail P2 mitral scallop.** A 3D echocardiographic view of the mitral valve from the left atrial perspective (“surgeon’s view”) demonstrates very clearly a flail P2 scallop with ruptured chordae tendinea. Best viewed in wmv format.

**Video S3. 2D echocardiography with color Doppler imaging of three mitral regurgitant jets.** A mid-esophageal commissural view demonstrates 3 jets of mitral regurgitation spanning the width of the mitral valve from lateral to medial (A1-P1, A2-P2, and A3-P3). Best viewed in wmv format.

**Video S4. 3D echocardiography with color Doppler demonstrating three jets of mitral regurgitation.** 3D color Doppler imaging from the left atrial perspective (“surgeon’s view”) demonstrates three jets of mitral regurgitation. The dominant jet appears to arise from the A1-P1 scallops (seen laterally, on the left side of the image). Best viewed in wmv format.
